# Supplementary material
Source: Royal Society of Chemistry journal article supplement (doi:10.1039/d6cp00321d)
Supplement: d6cp00321d1.pdf [file d6cp00321d1.pdf]

## Supplementary Information

for

### **Theoretical Study on the Photochemical Reaction Mechanism of HOSO Radical with CO**

Ya-Qing Mu, Peng-Bo Gao, Yuan-Hao Zhang, Di Mu, Yang Bai\* and Quan-Song Li\*

Key Laboratory of Cluster Science of Ministry of Education, School of Chemistry and Chemical Engineering, Beijing  
Institute of Technology, 100081 Beijing, China

E-mail: baiyang@bit.edu.cn

liquansong@bit.edu.cn

| Contents                                                                                                                                                                                                       | Starting Page |
|----------------------------------------------------------------------------------------------------------------------------------------------------------------------------------------------------------------|---------------|
| Table S1. Benchmark calculation results for the active space and basis set.                                                                                                                                    | S1            |
| Table S2. MS-CASPT2 energies of the critical points.                                                                                                                                                           | S2            |
| Table S3. TD-B3LYP vertical excitations at HOSO-D <sub>0</sub> .                                                                                                                                               | S6            |
| Table S4. TD-CAM-B3LYP vertical excitations at HOSO-D <sub>0</sub> .                                                                                                                                           | S6            |
| Table S5. TD- $\omega$ B97XD vertical excitations at HOSO-D <sub>0</sub> .                                                                                                                                     | S6            |
| Table S6. TD-B3LYP vertical excitations at CO-S <sub>0</sub> .                                                                                                                                                 | S7            |
| Table S7. TD-CAM-B3LYP vertical excitations at CO-S <sub>0</sub> .                                                                                                                                             | S7            |
| Table S8. MS-CASPT2 vertical excitations at CO-S <sub>0</sub> .                                                                                                                                                | S7            |
| Table S9. MS-CASPT2 vertical excitations at [OSOH $\cdots$ CO]-R-D <sub>0</sub> .                                                                                                                              | S8            |
| Table S10. MS-CASPT2 vertical excitations at [OSOH $\cdots$ OC]-R-D <sub>0</sub> .                                                                                                                             | S8            |
| Table S11. MS-CASPT2 vertical excitations at [OCOH $\cdots$ CO]-D <sub>0</sub> .                                                                                                                               | S9            |
| Figure S1. MS-CASPT2 energy plot from HOSO-D <sub>0</sub> to HOSO-(D <sub>3</sub> /D <sub>2</sub> ) <sub>X</sub> .                                                                                             | S10           |
| Figure S2. MS-CASPT2 energy plot from HOSO-(D <sub>3</sub> /D <sub>2</sub> ) <sub>X</sub> to HOSO-D <sub>2</sub> .                                                                                             | S10           |
| Figure S3. MS-CASPT2 energy plot from HOSO-D <sub>2</sub> to HOSO-(D <sub>2</sub> /D <sub>1</sub> ) <sub>X</sub> .                                                                                             | S11           |
| Figure S4. MS-CASPT2 energy plot from HOSO-(D <sub>2</sub> /D <sub>1</sub> ) <sub>X</sub> to HOSO-D <sub>1</sub> .                                                                                             | S11           |
| Figure S5. MS-CASPT2 energy plot from HOSO-(D <sub>2</sub> /D <sub>1</sub> ) <sub>X</sub> to HO+SO.                                                                                                            | S12           |
| Figure S6. MS-CASPT2 energy plot from HOSO + CO to HOSO $\cdots$ CO and HOSO $\cdots$ OC.                                                                                                                      | S12           |
| Figure S7. MS-CASPT2 energy plot from [OSOH $\cdots$ CO]-R-D <sub>0</sub> to [SO <sub>2</sub> $\cdots$ HCO]-D <sub>0</sub> via [OSO $\cdots$ H $\cdots$ CO]-TS-D <sub>0</sub> .                                | S13           |
| Figure S8. MS-CASPT2 energy plot from [OSOH $\cdots$ CO]-R-D <sub>1</sub> to [SO <sub>2</sub> -HCO]-(D <sub>1</sub> /D <sub>0</sub> ) <sub>X</sub> via [OSO $\cdots$ H $\cdots$ CO]-TS-D <sub>1</sub> .        | S13           |
| Figure S9. MS-CASPT2 energy plot from [SO <sub>2</sub> -HCO]-(D <sub>1</sub> /D <sub>0</sub> ) <sub>X</sub> to [SO <sub>2</sub> $\cdots$ HCO]-D <sub>0</sub> .                                                 | S14           |
| Figure S10. MS-CASPT2 energy plot from HOC-D <sub>0</sub> to HCO-D <sub>0</sub> via HOC-TS-D <sub>0</sub> .                                                                                                    | S14           |
| Figure S11. MS-CASPT2 energy plot from [OSOH $\cdots$ OC]-R-D <sub>1</sub> to [OSO $\cdots$ H $\cdots$ OC]-(D <sub>1</sub> /D <sub>0</sub> ) <sub>X</sub> via [OSO $\cdots$ H $\cdots$ OC]-TS-D <sub>1</sub> . | S15           |
| Figure S12. MS-CASPT2 energy plot from [OSO $\cdots$ H $\cdots$ OC]-(D <sub>1</sub> /D <sub>0</sub> ) <sub>X</sub> to [OSOH $\cdots$ OC]-R-D <sub>0</sub> .                                                    | S15           |
| Figure S13. MS-CASPT2 energy plot from [OSO $\cdots$ H $\cdots$ OC]-(D <sub>1</sub> /D <sub>0</sub> ) <sub>X</sub> to [SO <sub>2</sub> $\cdots$ HOC]-D <sub>0</sub> .                                          | S16           |
| Figure S14. MS-CASPT2 energy plot from [OCOH $\cdots$ CO]-D <sub>0</sub> to [OCOH $\cdots$ CO]-(D <sub>1</sub> /D <sub>0</sub> ) <sub>X</sub> .                                                                | S16           |
| Figure S15. MS-CASPT2 energy plot from [OCOH $\cdots$ CO]-(D <sub>1</sub> /D <sub>0</sub> ) <sub>X</sub> to [CO <sub>2</sub> $\cdots$ HCO]-D <sub>0</sub> .                                                    | S17           |
| Figure S16. MS-CASPT2 energy plot from 2SO-S <sub>0</sub> to OSOS-S <sub>0</sub> .                                                                                                                             | S17           |
| Figure S17. MS-CASPT2 energy plot from [OSOS $\cdots$ CO]-S <sub>0</sub> to [SO <sub>2</sub> $\cdots$ SCO]-S <sub>0</sub> via [OSO $\cdots$ S $\cdots$ CO]-TS-S <sub>0</sub> .                                 | S18           |
| Cartesian coordinates of the optimized structures by MS-CASPT2 method.                                                                                                                                         | S19           |

**Table S1.** Benchmark calculation results for the active space and basis set. Comparison of the vertical excitation energies ( $E$ ) by MS-CASPT2 methods with two active spaces, (19,13) and (13,10), and two basis sets, ANO-S-VDZP and cc-pVTZ, at the HOSO structure optimized by MS-CASPT2(13,10)/cc-pVTZ. Previous reported calculation results with MRCI+Q and MS-CASPT2 methods are also provided.

| States         | MS-CASPT2(13,10) |            | MS-CASPT2(19,13) |            | MRCI+Q                       | MS-CASPT2(13,10)        |
|----------------|------------------|------------|------------------|------------|------------------------------|-------------------------|
|                | cc-pVTZ          | ANO-S-VDZP | cc-pVTZ          | ANO-S-VDZP | aug-cc-pV(Q+d)Z <sup>a</sup> | ANO-S-VDZP <sup>b</sup> |
| D <sub>0</sub> | 0.00             | 0.00       | 0.00             | 0.00       | 0.00                         | 0.00                    |
| D <sub>1</sub> | 3.55             | 3.59       | 3.48             | 3.52       | 3.63                         | 3.83                    |
| D <sub>2</sub> | 3.73             | 3.71       | 3.73             | 3.64       | 4.38                         | 3.94                    |
| D <sub>3</sub> | 4.53             | 4.61       | 4.51             | 4.58       | 4.97                         | 4.87                    |

<sup>a</sup> Extracted from Table 1 of T. Trabelsi, J. M. Anglada, M. F. Ruiz-López and J. S. Francisco, *J. Chem. Phys.*, 2019, 151, 111103–111108.

<sup>b</sup> Extracted from Table S1 of J. Carmona-García, A. Francés-Monerris, C. A. Cuevas, T. Trabelsi, A. Saiz-Lopez, J. S. Francisco and D. Roca-Sanjuán, *J. Am. Chem. Soc.*, 2021, 143, 10836–10841.

**Table S2.** Absolute and relative MS-CASPT2 energies of the critical points in the PES.

| Structure                                           | State          | Absolute energy (Hartree) | Relative energy (eV) | Zero-point energy (ZPE, kcal mol <sup>-1</sup> ) | Relative energy with ZPE | Active space Zero point        |
|-----------------------------------------------------|----------------|---------------------------|----------------------|--------------------------------------------------|--------------------------|--------------------------------|
| HOSO-D <sub>0</sub>                                 | D <sub>0</sub> | -548.51754796             | 0.00                 | 10.443                                           | 0.00                     | (13,10)<br>HOSO-D <sub>0</sub> |
|                                                     | D <sub>1</sub> | -548.37059770             | 4.00                 |                                                  | 3.55                     |                                |
|                                                     | D <sub>2</sub> | -548.36388998             | 4.18                 |                                                  | 3.73                     |                                |
|                                                     | D <sub>3</sub> | -548.33445909             | 4.98                 |                                                  | 4.53                     |                                |
|                                                     | D <sub>4</sub> | -548.32750651             | 5.17                 |                                                  | 4.72                     |                                |
| HOSO-(D <sub>3</sub> /D <sub>2</sub> ) <sub>X</sub> | D <sub>0</sub> | -548.47756124             | 1.09                 | -----                                            | -                        | (13,10)<br>HOSO-D <sub>0</sub> |
|                                                     | D <sub>1</sub> | -548.39718325             | 3.28                 |                                                  |                          |                                |
|                                                     | D <sub>2</sub> | -548.37228154             | 3.95                 |                                                  |                          |                                |
|                                                     | D <sub>3</sub> | -548.37228023             | 3.95                 |                                                  |                          |                                |
|                                                     | D <sub>4</sub> | -548.31209381             | 5.59                 |                                                  |                          |                                |
| HOSO-D <sub>2</sub>                                 | D <sub>0</sub> | -548.48542973             | 0.87                 | 11.956                                           | 0.42                     | (13,10)<br>HOSO-D <sub>0</sub> |
|                                                     | D <sub>1</sub> | -548.39128955             | 3.44                 |                                                  | 2.98                     |                                |
|                                                     | D <sub>2</sub> | -548.38972157             | 3.48                 |                                                  | 3.54                     |                                |
|                                                     | D <sub>3</sub> | -548.36646395             | 4.11                 |                                                  | 3.66                     |                                |
|                                                     | D <sub>4</sub> | -548.32132875             | 5.34                 |                                                  | 4.89                     |                                |
| HOSO-(D <sub>2</sub> /D <sub>1</sub> ) <sub>X</sub> | D <sub>0</sub> | -548.44948364             | 1.85                 | -----                                            | -                        | (13,10)<br>HOSO-D <sub>0</sub> |
|                                                     | D <sub>1</sub> | -548.38435027             | 3.62                 |                                                  |                          |                                |
|                                                     | D <sub>2</sub> | -548.38434879             | 3.62                 |                                                  |                          |                                |
|                                                     | D <sub>3</sub> | -548.36235900             | 4.22                 |                                                  |                          |                                |
|                                                     | D <sub>4</sub> | -548.35180264             | 4.51                 |                                                  |                          |                                |
| HOSO-D <sub>1</sub>                                 | D <sub>0</sub> | -548.47498557             | 1.16                 | 10.447                                           | 0.71                     | (13,10)<br>HOSO-D <sub>0</sub> |
|                                                     | D <sub>1</sub> | -548.41293936             | 2.85                 |                                                  | 2.85                     |                                |
|                                                     | D <sub>2</sub> | -548.35701701             | 4.37                 |                                                  | 3.92                     |                                |
|                                                     | D <sub>3</sub> | -548.35126348             | 4.52                 |                                                  | 4.07                     |                                |
|                                                     | D <sub>4</sub> | -548.34724685             | 4.63                 |                                                  | 4.18                     |                                |
| HO+SO                                               | D <sub>0</sub> | -548.41856041             | 2.69                 | -----                                            | -                        | (13,10)<br>HOSO-D <sub>0</sub> |
|                                                     | D <sub>1</sub> | -548.41824534             | 2.70                 |                                                  |                          |                                |
|                                                     | D <sub>2</sub> | -548.39164463             | 3.43                 |                                                  |                          |                                |
|                                                     | D <sub>3</sub> | -548.39092827             | 3.45                 |                                                  |                          |                                |
|                                                     | D <sub>4</sub> | -548.39024689             | 3.46                 |                                                  |                          |                                |
| CO-S <sub>0</sub>                                   | S <sub>0</sub> | -113.13472227             | 0.00                 | 3.116                                            | 0.00                     | (6,6)<br>CO-S <sub>0</sub>     |
|                                                     | S <sub>1</sub> | -112.82129560             | 8.53                 |                                                  | 8.39                     |                                |
|                                                     | S <sub>2</sub> | -112.82129560             | 8.53                 |                                                  | 8.39                     |                                |

|                                                                       |                |               |      |        |      |                                           |
|-----------------------------------------------------------------------|----------------|---------------|------|--------|------|-------------------------------------------|
|                                                                       | S <sub>3</sub> | -112.77795167 | 9.71 |        | 9.57 |                                           |
|                                                                       | S <sub>4</sub> | -112.77238433 | 9.86 |        | 9.72 |                                           |
| Path 1: HOSO+CO→HCO+SO <sub>2</sub>                                   |                |               |      |        |      |                                           |
| [OSOH···CO]-R-D <sub>0</sub>                                          | D <sub>0</sub> | -661.66592379 | 0.00 | 14.822 | 0.00 | (9,9)<br>[OSOH···CO]-R-D <sub>0</sub>     |
|                                                                       | D <sub>1</sub> | -661.51499984 | 4.11 |        | 3.47 |                                           |
|                                                                       | D <sub>2</sub> | -661.51211819 | 4.19 |        | 3.55 |                                           |
|                                                                       | D <sub>3</sub> | -661.47188786 | 5.28 |        | 4.64 |                                           |
|                                                                       | D <sub>4</sub> | -661.42471768 | 6.56 |        | 5.92 |                                           |
| [OSO···H···CO]-TS-D <sub>0</sub>                                      | D <sub>0</sub> | -661.60294560 | 1.71 | 12.244 | 1.58 | (9,9)<br>[OSOH···CO]-R-D <sub>0</sub>     |
|                                                                       | D <sub>1</sub> | -661.53697019 | 3.51 |        | 2.87 |                                           |
|                                                                       | D <sub>2</sub> | -661.51132348 | 4.21 |        | 3.57 |                                           |
|                                                                       | D <sub>3</sub> | -661.48726051 | 4.86 |        | 4.22 |                                           |
|                                                                       | D <sub>4</sub> | -661.45571165 | 5.72 |        | 5.08 |                                           |
| [OSOH···CO]-R-D <sub>1</sub>                                          | D <sub>0</sub> | -661.62237201 | 1.19 | 14.371 | 0.55 | (9,9)<br>[OSOH···CO]-R-D <sub>0</sub>     |
|                                                                       | D <sub>1</sub> | -661.56049435 | 2.87 |        | 2.85 |                                           |
|                                                                       | D <sub>2</sub> | -661.50408584 | 4.40 |        | 3.76 |                                           |
|                                                                       | D <sub>3</sub> | -661.48723576 | 4.86 |        | 4.22 |                                           |
|                                                                       | D <sub>4</sub> | -661.46584055 | 5.44 |        | 4.81 |                                           |
| [OSO···H···CO]-TS-D <sub>1</sub>                                      | D <sub>0</sub> | -661.56206515 | 2.83 | 12.268 | 2.19 | (9,9)<br>[OSOH···CO]-R-D <sub>0</sub>     |
|                                                                       | D <sub>1</sub> | -661.51905696 | 4.00 |        | 3.89 |                                           |
|                                                                       | D <sub>2</sub> | -661.46707747 | 5.41 |        | 4.77 |                                           |
|                                                                       | D <sub>3</sub> | -661.45573490 | 5.72 |        | 5.08 |                                           |
|                                                                       | D <sub>4</sub> | -661.42001564 | 6.69 |        | 6.05 |                                           |
| [SO <sub>2</sub> -HCO]-(D <sub>1</sub> /D <sub>0</sub> ) <sub>x</sub> | D <sub>0</sub> | -661.55364761 | 3.06 | -----  | -    | (9,9)<br>[OSOH···CO]-R- D <sub>0</sub>    |
|                                                                       | D <sub>1</sub> | -661.55364551 | 3.06 |        |      |                                           |
|                                                                       | D <sub>2</sub> | -661.51309286 | 4.16 |        |      |                                           |
|                                                                       | D <sub>3</sub> | -661.49541772 | 4.64 |        |      |                                           |
|                                                                       | D <sub>4</sub> | -661.40487807 | 7.10 |        |      |                                           |
| [SO <sub>2</sub> ···HCO]-D <sub>0</sub>                               | D <sub>0</sub> | -661.61919056 | 1.27 | 13.141 | 1.20 | (9,9)<br>[OSOH···CO]-R-<br>D <sub>0</sub> |
|                                                                       | D <sub>1</sub> | -661.53316401 | 3.61 |        | 2.97 |                                           |
|                                                                       | D <sub>2</sub> | -661.51266528 | 4.17 |        | 3.53 |                                           |
|                                                                       | D <sub>3</sub> | -661.47489908 | 5.20 |        | 4.56 |                                           |
|                                                                       | D <sub>4</sub> | -661.46796058 | 5.39 |        | 4.75 |                                           |
| Path 2: HOSO+OC→HOC+SO <sub>2</sub> (step 1)                          |                |               |      |        |      |                                           |
| [OSOH···OC]-R-D <sub>0</sub>                                          | D <sub>0</sub> | -661.66208358 | 0.10 | 14.117 | 0.08 | (9,9)<br>[OSOH···CO]-R-D <sub>0</sub>     |
|                                                                       | D <sub>1</sub> | -661.50997881 | 4.24 |        | 3.60 |                                           |

|                                                                                 |                |               |       |        |       |                                    |
|---------------------------------------------------------------------------------|----------------|---------------|-------|--------|-------|------------------------------------|
|                                                                                 | D <sub>2</sub> | -661.50796612 | 4.30  |        | 3.66  |                                    |
|                                                                                 | D <sub>3</sub> | -661.46766623 | 5.39  |        | 4.76  |                                    |
|                                                                                 | D <sub>4</sub> | -661.43130035 | 6.38  |        | 5.75  |                                    |
| [OSO $\cdots$ OC]-R-D <sub>1</sub>                                              | D <sub>0</sub> | -661.62034861 | 1.24  | 13.956 | 0.60  | (9,9)                              |
|                                                                                 | D <sub>1</sub> | -661.55743706 | 2.95  |        | 2.92  | [OSO $\cdots$ CO]-R-D <sub>0</sub> |
|                                                                                 | D <sub>2</sub> | -661.50234413 | 4.45  |        | 3.81  |                                    |
|                                                                                 | D <sub>3</sub> | -661.48648726 | 4.88  |        | 4.24  |                                    |
|                                                                                 | D <sub>4</sub> | -661.46262550 | 5.53  |        | 4.89  |                                    |
| [OSO $\cdots$ H $\cdots$ OC]-TS-D <sub>1</sub>                                  | D <sub>0</sub> | -661.57665015 | 2.43  | 11.092 | 1.79  | (9,9)                              |
|                                                                                 | D <sub>1</sub> | -661.48764543 | 4.85  |        | 4.69  | [OSO $\cdots$ CO]-R-D <sub>0</sub> |
|                                                                                 | D <sub>2</sub> | -661.45689892 | 5.69  |        | 5.05  |                                    |
|                                                                                 | D <sub>3</sub> | -661.41643305 | 6.79  |        | 6.15  |                                    |
|                                                                                 | D <sub>4</sub> | -661.39127129 | 7.47  |        | 6.83  |                                    |
| [OSO $\cdots$ H $\cdots$ OC]-<br>(D <sub>1</sub> /D <sub>0</sub> ) <sub>x</sub> | D <sub>0</sub> | -661.53606732 | 3.53  | -----  | -     | (9,9)                              |
|                                                                                 | D <sub>1</sub> | -661.53606657 | 3.53  |        |       | [OSO $\cdots$ CO]-R-D <sub>0</sub> |
|                                                                                 | D <sub>2</sub> | -661.49827268 | 4.56  |        |       |                                    |
|                                                                                 | D <sub>3</sub> | -661.41667008 | 6.78  |        |       |                                    |
|                                                                                 | D <sub>4</sub> | -661.39583959 | 7.35  |        |       |                                    |
| [SO <sub>2</sub> $\cdots$ HOC]-D <sub>0</sub>                                   | D <sub>0</sub> | -661.54800092 | 3.21  | 16.016 | 2.18  | (9,9)                              |
|                                                                                 | D <sub>1</sub> | -661.51462124 | 4.12  |        | 3.48  | [OSO $\cdots$ CO]-R-D <sub>0</sub> |
|                                                                                 | D <sub>2</sub> | -661.47134228 | 5.29  |        | 4.66  |                                    |
|                                                                                 | D <sub>3</sub> | -661.40785074 | 7.02  |        | 6.38  |                                    |
|                                                                                 | D <sub>4</sub> | -661.39717693 | 7.31  |        | 6.67  |                                    |
| Path 2: HOC $\rightarrow$ HCO (step 2)                                          |                |               |       |        |       |                                    |
| HOC-D <sub>0</sub>                                                              | D <sub>0</sub> | -113.60367252 | 0.00  | 8.541  | 0.00  | (3,5)                              |
|                                                                                 | D <sub>1</sub> | -113.57037083 | 0.91  |        | 0.54  | HOC-D <sub>0</sub>                 |
|                                                                                 | D <sub>2</sub> | -113.42476189 | 4.87  |        | 4.50  |                                    |
|                                                                                 | D <sub>3</sub> | -113.39187145 | 5.76  |        | 5.39  |                                    |
|                                                                                 | D <sub>4</sub> | -113.38489199 | 5.95  |        | 5.58  |                                    |
| HOC-TS-D <sub>0</sub>                                                           | D <sub>0</sub> | -113.56742436 | 0.99  | 5.808  | 0.87  | (3,5)                              |
|                                                                                 | D <sub>1</sub> | -113.53893794 | 1.76  |        | 1.39  | HOC-D <sub>0</sub>                 |
|                                                                                 | D <sub>2</sub> | -113.42451507 | 4.88  |        | 4.50  |                                    |
|                                                                                 | D <sub>3</sub> | -113.35467532 | 6.78  |        | 6.41  |                                    |
|                                                                                 | D <sub>4</sub> | -113.35192268 | 6.85  |        | 6.48  |                                    |
| HCO-D <sub>0</sub>                                                              | D <sub>0</sub> | -113.65992079 | -1.53 | 8.238  | -1.60 | (3,5)                              |
|                                                                                 | D <sub>1</sub> | -113.58597310 | 0.48  |        | 0.11  | HOC-D <sub>0</sub>                 |

|                                                          |                |                |       |        |       |                          |
|----------------------------------------------------------|----------------|----------------|-------|--------|-------|--------------------------|
|                                                          | D <sub>2</sub> | -113.44274113  | 4.38  |        | 4.01  |                          |
|                                                          | D <sub>3</sub> | -113.42157222  | 4.96  |        | 4.58  |                          |
|                                                          | D <sub>4</sub> | -113.38561082  | 5.93  |        | 5.56  |                          |
| Path 3: HOCO+CO→HCO+CO <sub>2</sub>                      |                |                |       |        |       |                          |
| [OCOH…CO]-D <sub>0</sub>                                 | D <sub>0</sub> | -301.95287976  | 0.00  | 17.136 | 0.00  | (7,7)                    |
|                                                          | D <sub>1</sub> | -301.81041765  | 3.88  |        | 3.13  | [OCOH…CO]-D <sub>0</sub> |
|                                                          | D <sub>2</sub> | -301.74635499  | 5.62  |        | 4.88  |                          |
|                                                          | D <sub>3</sub> | -301.74112572  | 5.76  |        | 5.02  |                          |
|                                                          | D <sub>4</sub> | -301.71451819  | 6.49  |        | 5.74  |                          |
| [OCOH…CO]-(D <sub>1</sub> /D <sub>0</sub> ) <sub>x</sub> | D <sub>0</sub> | -301.86296103  | 2.45  | -----  | -     | (7,7)                    |
|                                                          | D <sub>1</sub> | -301.86295749  | 2.45  |        |       | [OCOH…CO]-D <sub>0</sub> |
|                                                          | D <sub>2</sub> | -301.78185529  | 4.65  |        |       |                          |
|                                                          | D <sub>3</sub> | -301.60873144  | 9.36  |        |       |                          |
|                                                          | D <sub>4</sub> | -301.59401473  | 9.77  |        |       |                          |
| [CO <sub>2</sub> …HCO]-D <sub>0</sub>                    | D <sub>0</sub> | -301.98067143  | -0.76 | 16.765 | 0.10  | (7,7)                    |
|                                                          | D <sub>1</sub> | -301.89578334  | 1.55  |        | 1.55  | [OCOH…CO]-D <sub>0</sub> |
|                                                          | D <sub>2</sub> | -301.69253037  | 7.08  |        | 7.08  |                          |
|                                                          | D <sub>3</sub> | -301.67211083  | 7.64  |        | 7.64  |                          |
|                                                          | D <sub>4</sub> | -301.67203498  | 7.64  |        | 7.64  |                          |
| Path 3: OSOS+CO→SO <sub>2</sub> +SCO                     |                |                |       |        |       |                          |
| [OSOS…CO]-S <sub>0</sub>                                 | S <sub>0</sub> | -1058.74133601 | 0.00  | 8.102  | 0.00  | (10,10)                  |
|                                                          | S <sub>1</sub> | -1058.70530732 | 0.98  |        | 0.63  | [OSOS…CO]-S <sub>0</sub> |
|                                                          | S <sub>2</sub> | -1058.61705491 | 3.38  |        | 3.03  |                          |
|                                                          | S <sub>3</sub> | -1058.56398537 | 4.83  |        | 4.47  |                          |
|                                                          | S <sub>4</sub> | -1058.53752239 | 5.55  |        | 5.19  |                          |
| [OSO…S…CO]-TS-S <sub>0</sub>                             | S <sub>0</sub> | -1058.73658448 | 0.13  | 11.900 | 0.18  | (10,10)                  |
|                                                          | S <sub>1</sub> | -1058.68964725 | 1.41  |        | 1.05  | [OSOS…CO]-S <sub>0</sub> |
|                                                          | S <sub>2</sub> | -1058.63186043 | 2.98  |        | 2.63  |                          |
|                                                          | S <sub>3</sub> | -1058.55012036 | 5.20  |        | 4.85  |                          |
|                                                          | S <sub>4</sub> | -1058.51881668 | 6.06  |        | 5.70  |                          |
| [SO <sub>2</sub> …SCO]-S <sub>0</sub>                    | S <sub>0</sub> | -1058.83065690 | -2.43 | 10.218 | -2.23 | (10,10)                  |
|                                                          | S <sub>1</sub> | -1058.68689447 | 1.48  |        | 1.13  | [OSOS-CO]-S <sub>0</sub> |
|                                                          | S <sub>2</sub> | -1058.68000742 | 1.67  |        | 1.32  |                          |
|                                                          | S <sub>3</sub> | -1058.63696993 | 2.84  |        | 2.49  |                          |
|                                                          | S <sub>4</sub> | -1058.63289443 | 2.95  |        | 2.60  |                          |

**Table S3.** Relative TD-B3LYP vertical excitation energy ( $E$ ) and wavelength ( $\lambda$ ) at HOSO-D<sub>0</sub> together with the electronic configuration (weight in the parenthesis, related orbitals in the lower part of the Table) and oscillation strength ( $f$ ).

| State          | Configuration (weight)           | $E/eV$ | $\lambda/nm$ | $f$    |
|----------------|----------------------------------|--------|--------------|--------|
| D <sub>0</sub> | SOMO                             | 0.00   | -            | -      |
| D <sub>1</sub> | SOMO-1 $\rightarrow$ SOMO (0.99) | 3.44   | 360          | 0.0012 |
| D <sub>2</sub> | SOMO $\rightarrow$ SOMO+1 (0.96) | 3.89   | 319          | 0.0000 |
| D <sub>3</sub> | SOMO-2 $\rightarrow$ SOMO (0.92) | 4.44   | 279          | 0.0263 |
| D <sub>4</sub> | SOMO $\rightarrow$ SOMO+2 (0.90) | 4.91   | 252          | 0.0006 |

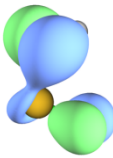





**SOMO-2**
**SOMO-1**
**SOMO**
**SOMO+1**
**SOMO+2**

**Table S4.** Relative TD-CAM-B3LYP vertical excitation energy ( $\Delta E$ ) and wavelength ( $\lambda$ ) at HOSO-D<sub>0</sub> together with the electronic configuration (weight in the parenthesis, related orbitals in the lower part of the Table) and oscillation strength ( $f$ ).

| State          | Configuration (weight)           | $E/eV$ | $\lambda/nm$ | $f$    |
|----------------|----------------------------------|--------|--------------|--------|
| D <sub>0</sub> | SOMO                             | 0.00   | -            | -      |
| D <sub>1</sub> | SOMO-1 $\rightarrow$ SOMO (0.98) | 3.55   | 350          | 0.0014 |
| D <sub>2</sub> | SOMO $\rightarrow$ SOMO+1 (0.80) | 4.09   | 303          | 0.0001 |
| D <sub>3</sub> | SOMO-2 $\rightarrow$ SOMO (0.91) | 4.65   | 266          | 0.0321 |
| D <sub>4</sub> | SOMO $\rightarrow$ SOMO+2 (0.68) | 5.07   | 245          | 0.0009 |

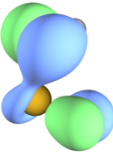





**SOMO-2**
**SOMO-1**
**SOMO**
**SOMO+1**
**SOMO+2**

**Table S5.** Relative TD- $\omega$ B97XD vertical excitation energy ( $\Delta E$ ) and wavelength ( $\lambda$ ) at HOSO-D<sub>0</sub> together with the electronic configuration (weight in the parenthesis, related orbitals in the lower part of the Table) and oscillation strength ( $f$ ).

| State          | Configuration (weight)           | $E/eV$ | $\lambda/nm$ | $f$    |
|----------------|----------------------------------|--------|--------------|--------|
| D <sub>0</sub> | SOMO                             | 0.00   | -            | -      |
| D <sub>1</sub> | SOMO-1 $\rightarrow$ SOMO (0.98) | 3.53   | 351          | 0.0015 |
| D <sub>2</sub> | SOMO $\rightarrow$ SOMO+1 (0.84) | 4.16   | 298          | 0.0001 |
| D <sub>3</sub> | SOMO-2 $\rightarrow$ SOMO (0.91) | 4.70   | 264          | 0.0321 |
| D <sub>4</sub> | SOMO $\rightarrow$ SOMO+2 (0.71) | 5.16   | 240          | 0.0010 |

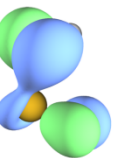





**SOMO-2**
**SOMO-1**
**SOMO**
**SOMO+1**
**SOMO+2**

**Table S6.** Relative TD-B3LYP vertical excitation energy ( $E$ ) and wavelength ( $\lambda$ ) at CO-S<sub>0</sub> together with the electronic configuration (weight in the parenthesis, related orbitals in the lower part of the Table) and oscillation strength ( $f$ ).

| State          | Configuration (weight) | $E/eV$ | $\lambda/nm$ | $f$    |
|----------------|------------------------|--------|--------------|--------|
| S <sub>0</sub> | -                      | 0.00   | -            | -      |
| S <sub>1</sub> | HOMO → LUMO (0.98)     | 8.36   | 148          | 0.0905 |
| S <sub>2</sub> | HOMO → LUMO + 1 (0.98) | 8.36   | 148          | 0.0905 |
| S <sub>3</sub> | HOMO-1 → LUMO (0.49)   | 9.57   | 130          | 0.0000 |
| S <sub>4</sub> | HOMO-2 → LUMO (0.46)   | 9.91   | 125          | 0.0000 |
|                | HOMO-1 → LUMO (0.46)   |        |              |        |

HOMO-2      HOMO-1      HOMO      LUMO      LUMO+1

**Table S7.** Relative TD-CAM-B3LYP vertical excitation energy ( $E$ ) and wavelength ( $\lambda$ ) at CO-S<sub>0</sub> together with the electronic configuration (weight in the parenthesis, related orbitals in the lower part of the Table) and oscillation strength ( $f$ ).

| State          | Configuration (weight) | $E/eV$ | $\lambda/nm$ | $f$    |
|----------------|------------------------|--------|--------------|--------|
| S <sub>0</sub> | -                      | 0.00   | -            | -      |
| S <sub>1</sub> | HOMO → LUMO (0.95)     | 8.48   | 146          | 0.0938 |
| S <sub>2</sub> | HOMO → LUMO + 1 (0.95) | 8.48   | 146          | 0.0938 |
| S <sub>3</sub> | HOMO-1 → LUMO (0.46)   | 9.64   | 129          | 0.0000 |
| S <sub>4</sub> | HOMO-2 → LUMO (0.46)   | 10.04  | 123          | 0.0000 |
|                | HOMO-1 → LUMO (0.46)   |        |              |        |

HOMO-2      HOMO-1      HOMO      LUMO      LUMO+1

**Table S8.** Relative MS-CASPT2(6,6) vertical excitation energy with ZPE ( $E$ ) and wavelength ( $\lambda$ ) at CO-S<sub>0</sub> together with the electronic configuration (weight in the parenthesis, active orbitals in the lower part of the Table) and oscillation strength ( $f$ ).

| State          | Configuration (weight)         | $E/eV$ | $\lambda/nm$ | $f$    |
|----------------|--------------------------------|--------|--------------|--------|
| S <sub>0</sub> | 222000 (0.94)                  | 0.00   | -            | -      |
| S <sub>1</sub> | 22ud00 (0.71)                  | 8.39   | 148          | 0.1651 |
| S <sub>2</sub> | 22u0d0 (0.71)                  | 8.39   | 148          | 0.1651 |
| S <sub>3</sub> | 2u20d0 (0.47)<br>u22d00 (0.47) | 9.57   | 130          | 0.0003 |
| S <sub>4</sub> | 2u2d00 (0.45)<br>u220d0 (0.45) | 9.72   | 127          | 0.0003 |

1      2      3      4      5      6

“u” and “d” stand for singly occupied orbitals with electrons of spin up (u) or spin down (d)

**Table S9.** Relative MS-CASPT2 vertical excitation energy with ZPE ( $E$ ) and wavelength ( $\lambda$ ) at [OSOH $\cdots$ CO]-R-D<sub>0</sub> together with the electronic configuration (weight in the parenthesis, active orbitals in the lower part of the Table), and oscillation strength ( $f$ ).

| State          | Configuration (weight) | $E/eV$ | $\lambda/nm$ | $f$    |
|----------------|------------------------|--------|--------------|--------|
| D <sub>0</sub> | 2222u0000(0.91)        | 0.00   | -            | -      |
| D <sub>1</sub> | 2u2220000(0.60)        | 3.47   | 357          | 0.0021 |
| D <sub>2</sub> | 2222000u0(0.59)        | 3.55   | 349          | 0.0050 |
| D <sub>3</sub> | u22220000(0.81)        | 4.64   | 267          | 0.0388 |
| D <sub>4</sub> | 222u20000(0.93)        | 5.92   | 209          | 0.0009 |

“u” and “d” stand for singly occupied orbitals with electrons of spin up (u) or spin down (d)

**Table S10.** Relative MS-CASPT2 vertical excitation energy with ZPE ( $E$ ) and wavelength ( $\lambda$ ) at [OSOH $\cdots$ OC]-R-D<sub>0</sub> together with the electronic configuration (weight in the parenthesis, active space below the Table) and oscillation strength ( $f$ ).

| State          | Configuration (weight) | $E/eV$ | $\lambda/nm$ | $f$    |
|----------------|------------------------|--------|--------------|--------|
| D <sub>0</sub> | 2222u0000(0.92)        | 0.00   | -            | -      |
| D <sub>1</sub> | 2u2220000(0.64)        | 3.53   | 352          | 0.0020 |
| D <sub>2</sub> | 2222000u0(0.62)        | 3.58   | 346          | 0.0044 |
| D <sub>3</sub> | u22220000(0.81)        | 4.68   | 265          | 0.0401 |
| D <sub>4</sub> | 222u20000(0.60)        | 5.67   | 219          | 0.0001 |

“u” and “d” stand for singly occupied orbitals with electrons of spin up (u) or spin down (d)

**Table S11.** Relative MS-CASPT2 vertical excitation energy with ZPE ( $E$ ) and wavelength ( $\lambda$ ) at [OCOH $\cdots$ CO]-D<sub>0</sub> together with the electronic configuration (weight in the parenthesis, active orbitals in the lower part of the Table) and oscillation strength ( $f$ ).

| State          | Configuration (weight) | $E/eV$ | $\lambda/nm$ | $f$    |
|----------------|------------------------|--------|--------------|--------|
| D <sub>0</sub> | 222u000 (0.90)         | 0.00   | -            | -      |
| D <sub>1</sub> | 222000u (0.86)         | 3.13   | 396          | 0.0098 |
| D <sub>2</sub> | 2u22000 (0.51)         | 4.88   | 254          | 0.0084 |
| D <sub>3</sub> | u222000 (0.90)         | 5.02   | 247          | 0.0290 |
| D <sub>4</sub> | 22ud0u0 (0.43)         | 5.74   | 216          | 0.0009 |

“u” and “d” stand for singly occupied orbitals with electrons of spin up (u) or spin down (d)

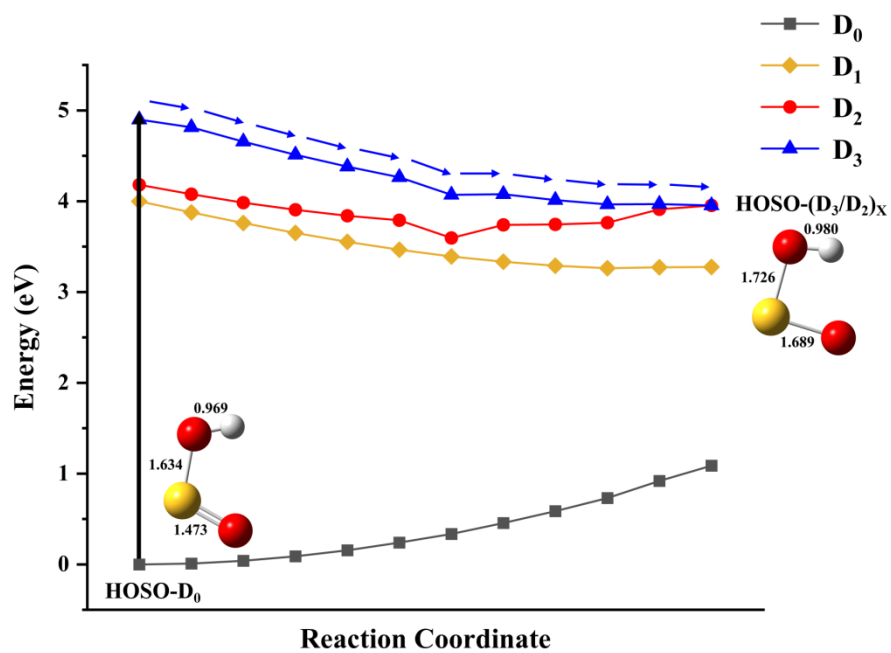

**Figure S1.** Energy plot from HOSO-D<sub>0</sub> to HOSO-(D<sub>3</sub>/D<sub>2</sub>)<sub>x</sub>. Bond lengths are given in Å.

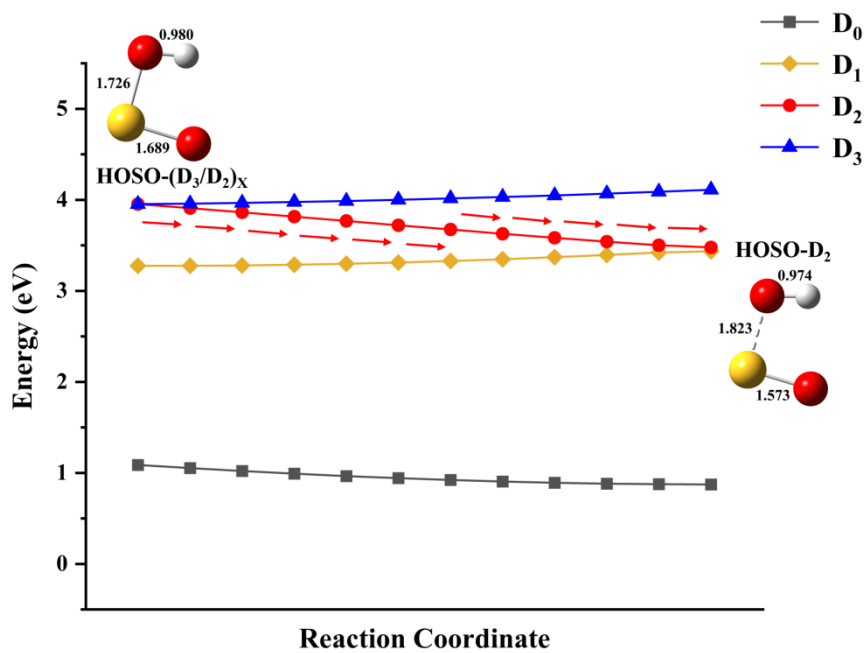

**Figure S2.** Energy plot from HOSO-(D<sub>3</sub>/D<sub>2</sub>)<sub>x</sub> to HOSO-D<sub>2</sub>. Bond lengths are given in Å.

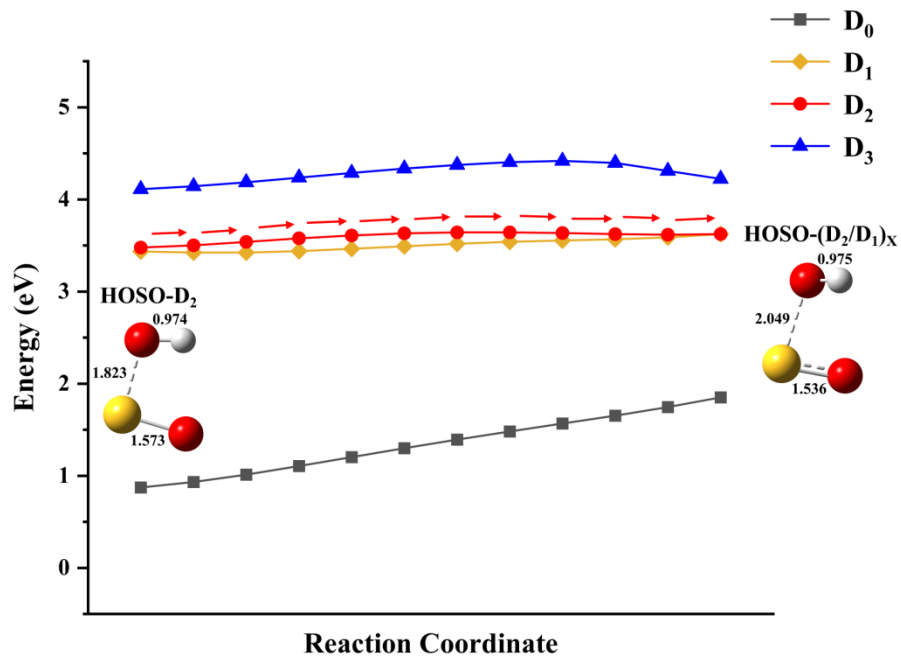

**Figure S3.** Energy plot from HOSO-D<sub>2</sub> to HOSO-(D<sub>2</sub>/D<sub>1</sub>)<sub>x</sub>. Bond lengths are given in Å.

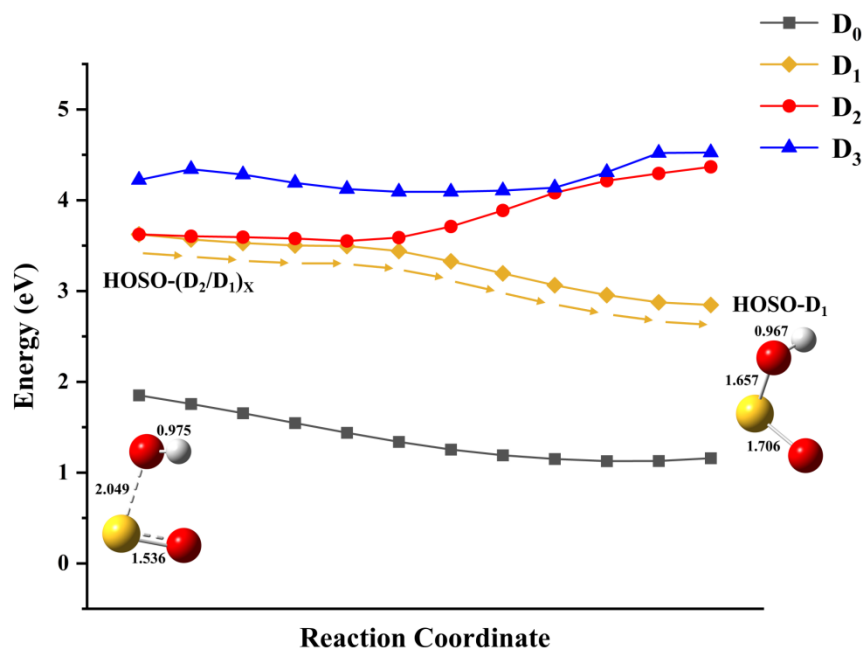

**Figure S4.** Energy plot from HOSO-(D<sub>2</sub>/D<sub>1</sub>)<sub>x</sub> to HOSO-D<sub>1</sub>. Bond lengths are given in Å.

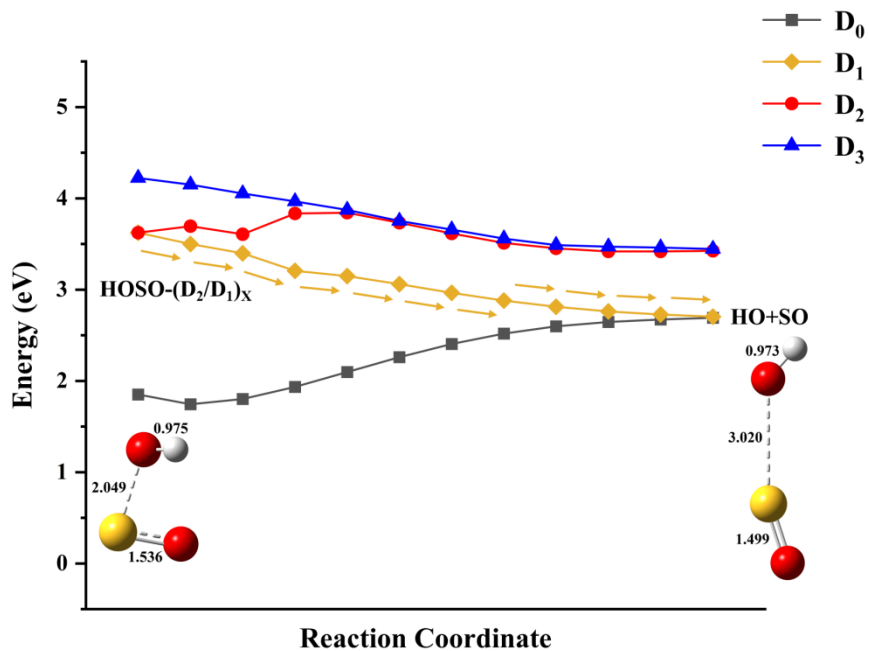

**Figure S5.** Energy plot from HOSO-(D<sub>2</sub>/D<sub>1</sub>)<sub>x</sub> to HO+SO. Bond lengths are given in Å.

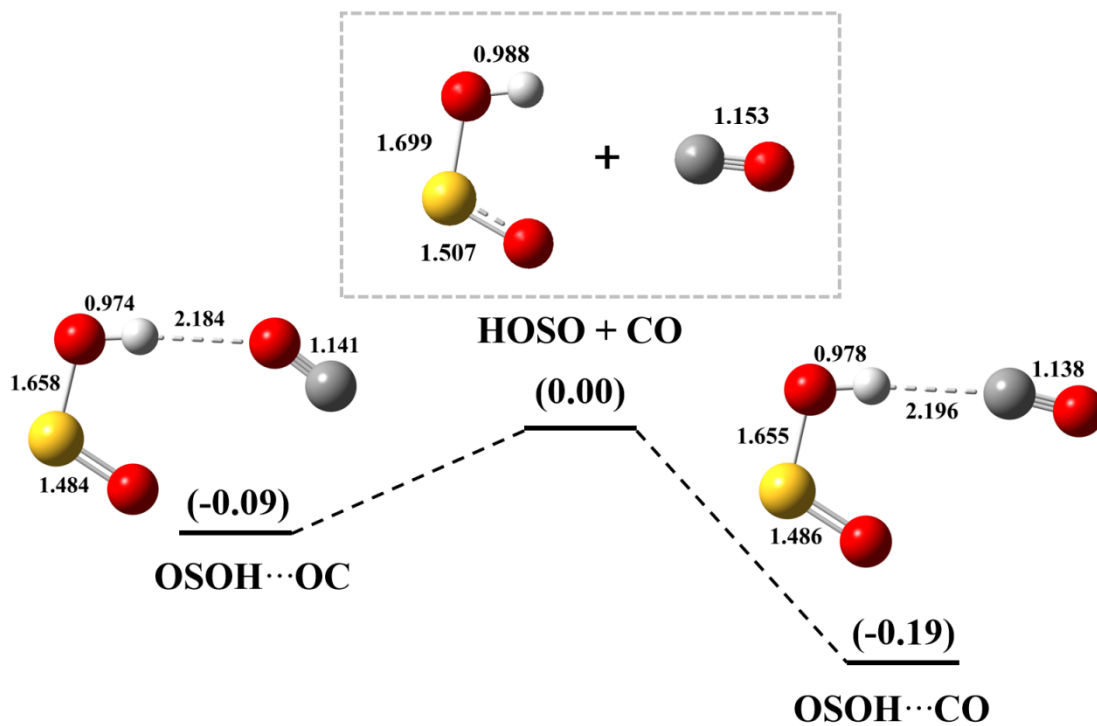

**Figure S6.** MS-CASPT2 energy profile (energy in eV) and key structures (distance in Å) from HOSO + CO to OSOH...CO and OSOH...OC.

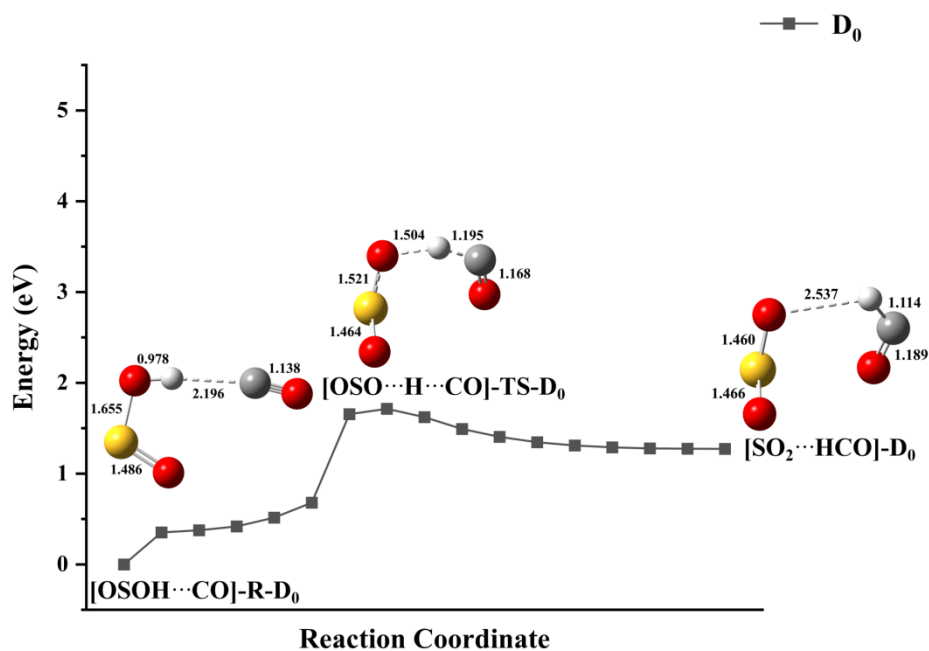

**Figure S7.** Energy plot from [OSOH...CO]-R-D<sub>0</sub> to [SO<sub>2</sub>...HCO]-D<sub>0</sub> via [OSO...H...CO]-TS-D<sub>0</sub>. Bond lengths are given in Å.

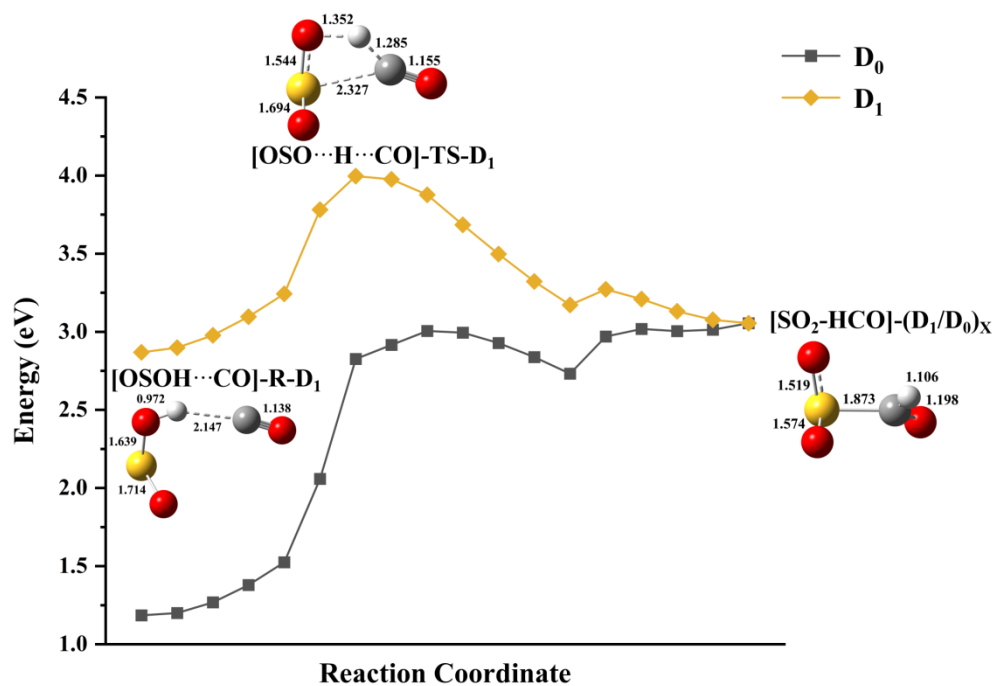

**Figure S8.** Energy plot from [OSOH...CO]-R-D<sub>1</sub> to [SO<sub>2</sub>-HCO]-(D<sub>1</sub>/D<sub>0</sub>)<sub>x</sub> via [OSO...H...CO]-TS-D<sub>1</sub>. Bond lengths are given in Å.

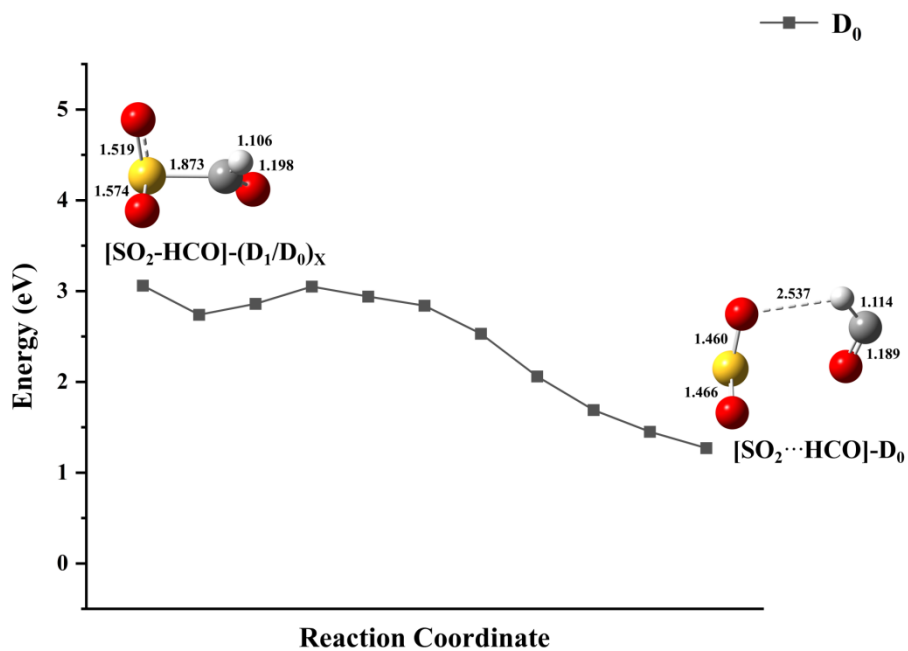

Figure S9. Energy plot from  $[\text{SO}_2\text{-HCO}]-(\text{D}_1/\text{D}_0)_x$  to  $[\text{SO}_2\cdots\text{HCO}]-\text{D}_0$ . Bond lengths are given in Å.

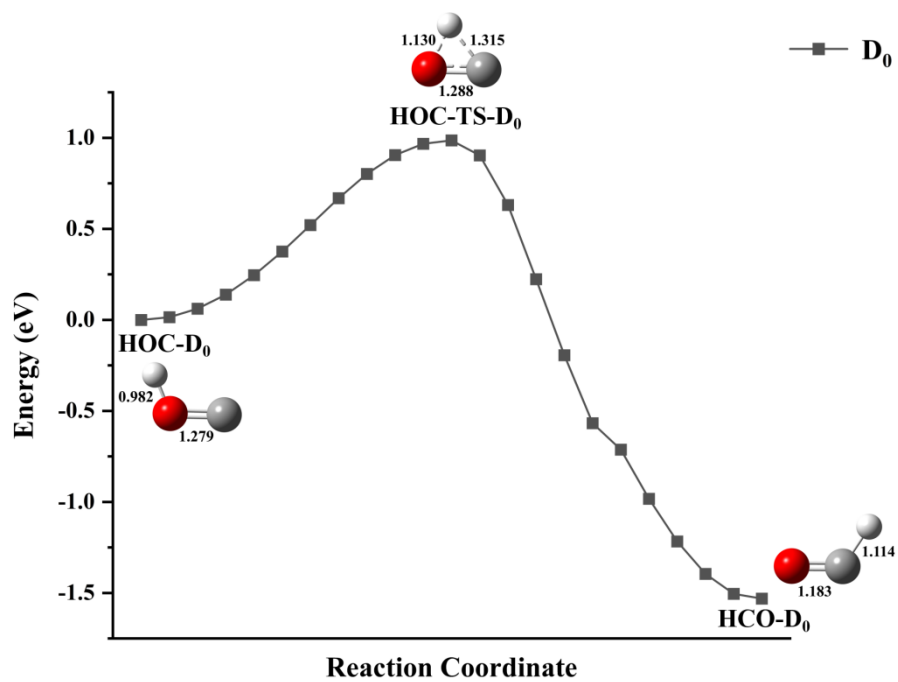

Figure S10. Energy plot from  $\text{HOC}-\text{D}_0$  to  $\text{HCO}-\text{D}_0$  via  $\text{HOC-TS}-\text{D}_0$ . Bond lengths are given in Å.

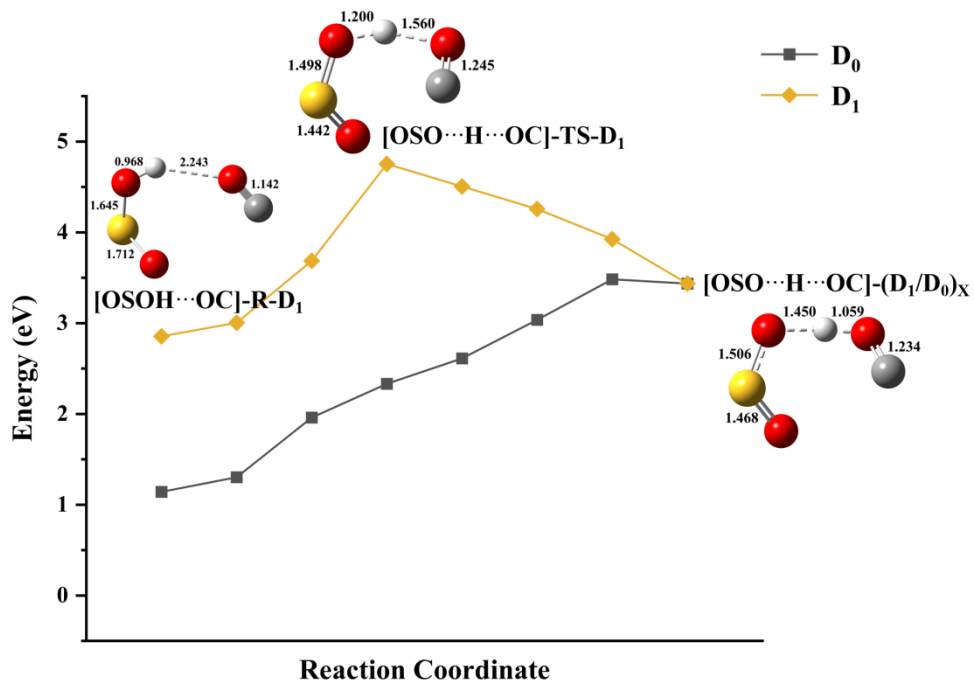

**Figure S11.** Energy plot from  $[\text{OSOH}\cdots\text{OC}]\text{-R-D}_1$  to  $[\text{OSO}\cdots\text{H}\cdots\text{OC}]\text{-(D}_1/\text{D}_0)_\text{X}$  via  $[\text{OSO}\cdots\text{H}\cdots\text{OC}]\text{-TS-D}_1$ . Bond lengths are given in Å.

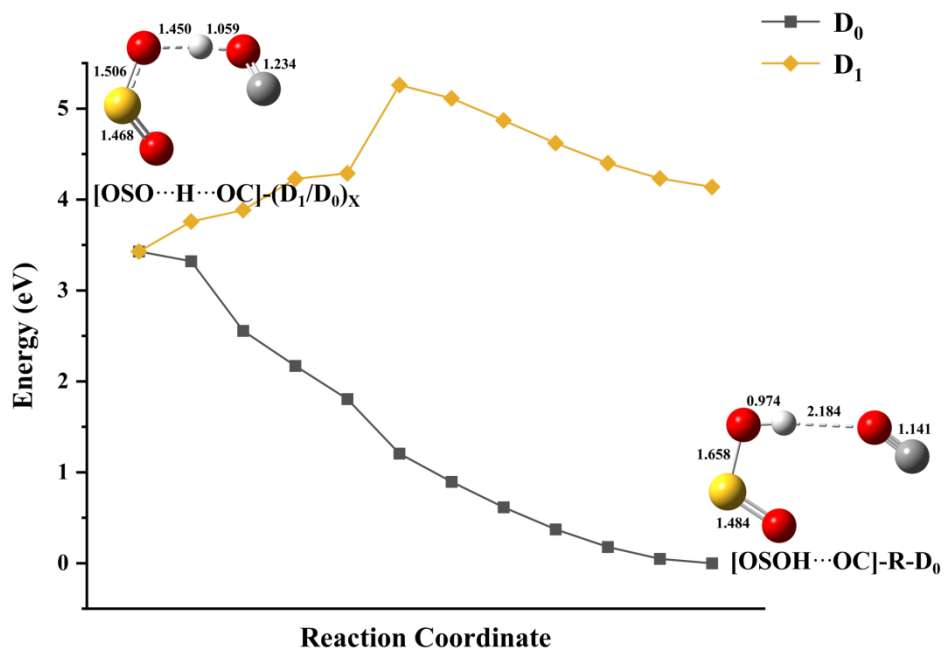

**Figure S12.** Energy plot from  $[\text{OSO}\cdots\text{H}\cdots\text{OC}]\text{-(D}_1/\text{D}_0)_\text{X}$  to  $[\text{OSOH}\cdots\text{OC}]\text{-R-D}_0$ . Bond lengths are given in Å.

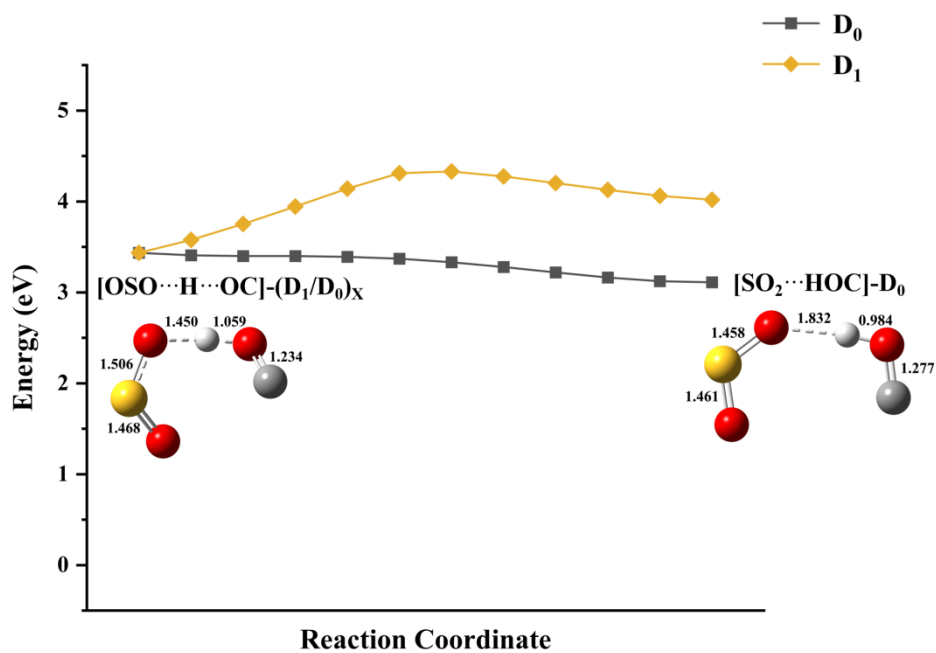

Figure S13. Energy plot from  $[\text{OSO}\cdots\text{H}\cdots\text{OC}]-(\text{D}_1/\text{D}_0)_x$  to  $[\text{SO}_2\cdots\text{HOC}]-\text{D}_0$ . Bond lengths are given in Å.

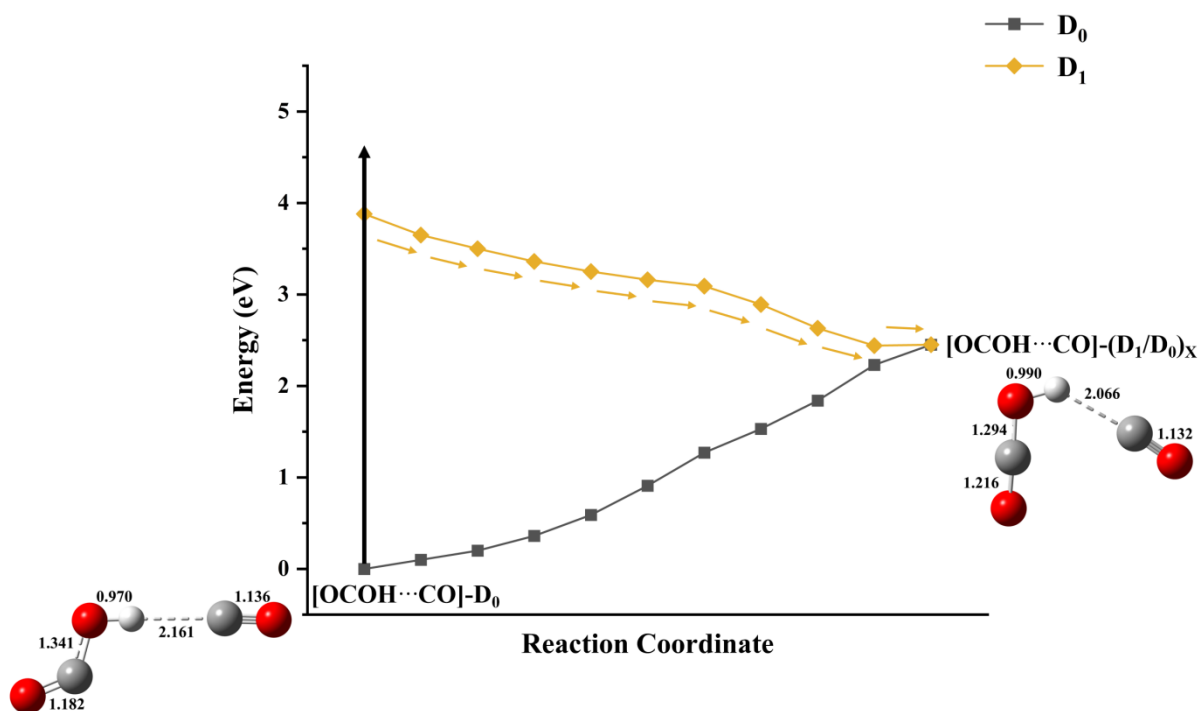

Figure S14. Energy plot from  $[\text{OCOH}\cdots\text{CO}]-\text{D}_0$  to  $[\text{OCOH}\cdots\text{CO}]-(\text{D}_1/\text{D}_0)_x$ . Bond lengths are given in Å.

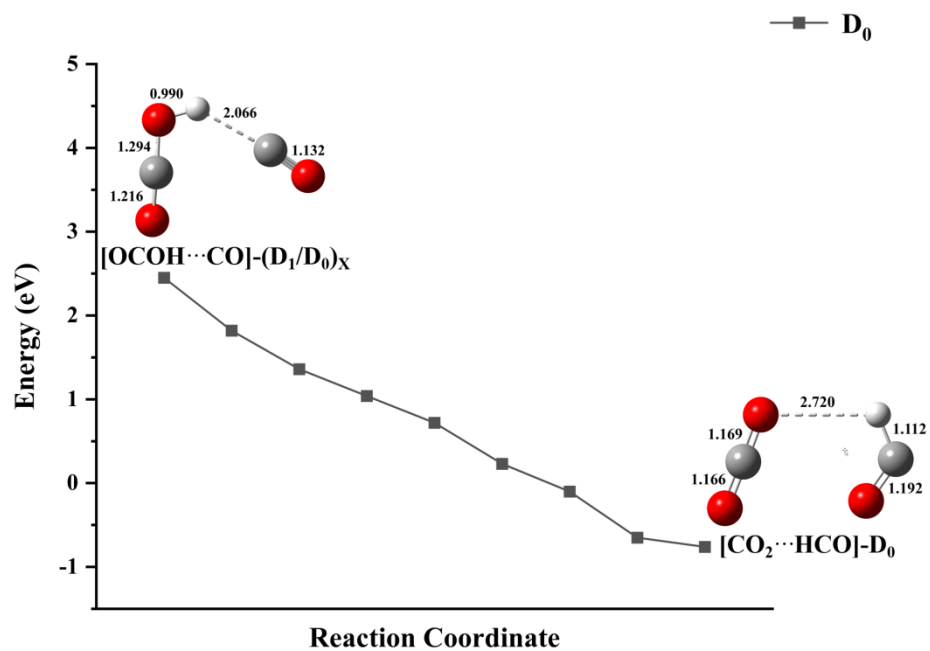

Figure S15. Energy plot from  $[OCOH \cdots CO]-(D_1/D_0)_x$  to  $[CO_2 \cdots HCO]-D_0$ . Bond lengths are given in Å.

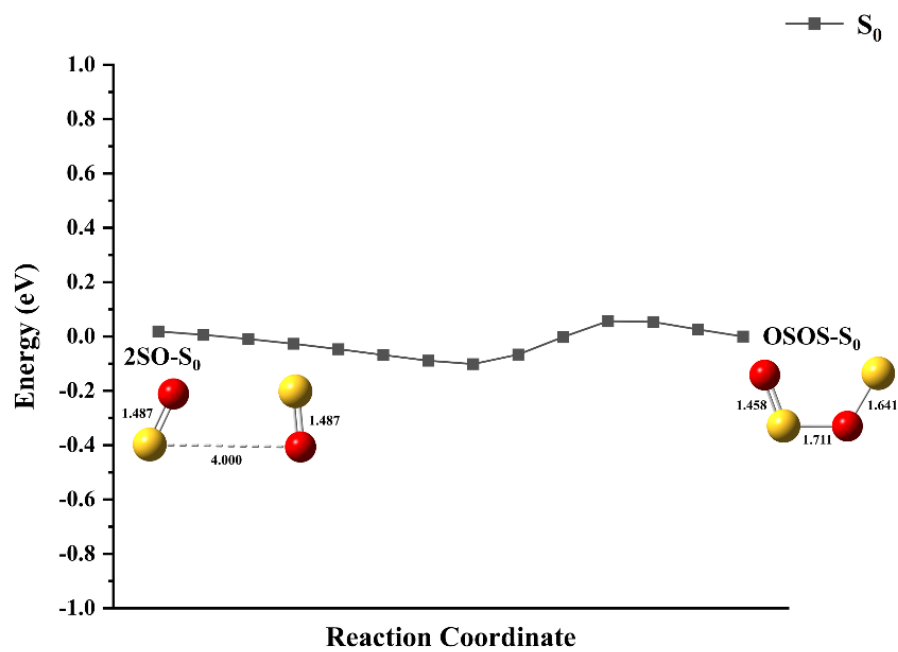

Figure S16. Energy plot from  $2SO-S_0$  to  $OSOS-S_0$ . Bond lengths are given in Å.

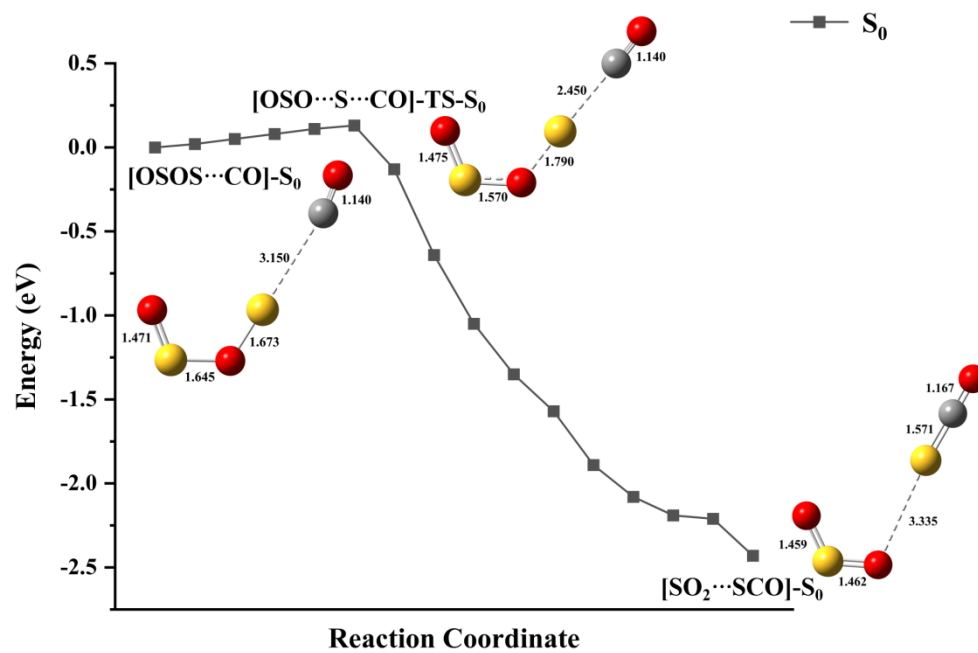

**Figure S17.** Energy plot from [OSOS...CO]-S<sub>0</sub> to [SO<sub>2</sub>...SCO]-S<sub>0</sub> via [OSO...S...CO]-TS-S<sub>0</sub>. Bond lengths are given in Å.

## Cartesian coordinates of the optimized structures by MS-CASPT2 method

| HOSO→HO+SO                          |           |           |           |                                                     |           |           |           |
|-------------------------------------|-----------|-----------|-----------|-----------------------------------------------------|-----------|-----------|-----------|
| HOSO-D <sub>0</sub>                 |           |           |           | HOSO-(D <sub>3</sub> /D <sub>2</sub> ) <sub>X</sub> |           |           |           |
| S1                                  | -0.131294 | -0.476905 | 0.031254  | S1                                                  | -0.094205 | -0.621327 | -0.090182 |
| O2                                  | 1.318574  | 0.267414  | -0.086701 | O2                                                  | 1.357964  | 0.300355  | 0.055880  |
| H3                                  | 1.231710  | 1.159512  | 0.281844  | H3                                                  | 0.987600  | 1.199574  | 0.174212  |
| O4                                  | -1.183963 | 0.552467  | -0.011230 | O4                                                  | -1.064161 | 0.750214  | 0.084834  |
| HOSO-D <sub>2</sub>                 |           |           |           | HOSO-(D <sub>2</sub> /D <sub>1</sub> ) <sub>X</sub> |           |           |           |
| S1                                  | -0.191287 | -0.648247 | -0.064431 | S1                                                  | -0.254080 | -0.686441 | -0.270337 |
| O2                                  | 1.374704  | 0.279271  | 0.044790  | O2                                                  | 1.314594  | 0.401756  | 0.474980  |
| H3                                  | 1.095367  | 1.205415  | 0.157032  | H3                                                  | 1.208417  | 1.199031  | -0.076817 |
| O4                                  | -1.043758 | 0.666048  | 0.077776  | O4                                                  | -1.033903 | 0.588142  | 0.087341  |
| HOSO-D <sub>1</sub>                 |           |           |           | HO+SO                                               |           |           |           |
| S1                                  | -0.054948 | -0.545964 | 0.212595  | S1                                                  | -0.832988 | -0.424002 | -0.042743 |
| O2                                  | 1.173572  | 0.445079  | -0.290819 | O2                                                  | 2.021201  | 0.554404  | 0.079189  |
| H3                                  | 1.391816  | 1.017809  | 0.457698  | H3                                                  | 2.489049  | 1.400485  | 0.179793  |
| O4                                  | -1.275413 | 0.585564  | -0.164308 | O4                                                  | -2.331709 | -0.456716 | -0.051027 |
| Path 1: HOSO+CO→HCO+SO <sub>2</sub> |           |           |           |                                                     |           |           |           |
| [OSOH⋯CO]-R-D <sub>0</sub>          |           |           |           | [OSOH⋯CO]-R-D <sub>1</sub>                          |           |           |           |
| O1                                  | -0.775341 | 1.335034  | 0.180032  | O1                                                  | -0.751487 | 1.117336  | 0.542012  |
| S2                                  | -1.638652 | -0.075117 | 0.103479  | S2                                                  | -1.206185 | 0.073752  | -0.637099 |
| O3                                  | -0.717419 | -1.236613 | 0.005046  | O3                                                  | -1.023462 | -1.327895 | 0.331902  |
| C4                                  | 2.202675  | 0.265974  | -0.010772 | C4                                                  | 2.121418  | 0.304060  | -0.044361 |
| O5                                  | 3.156715  | -0.348772 | -0.092111 | O5                                                  | 3.034142  | -0.278050 | -0.394722 |
| H6                                  | 0.166905  | 1.077741  | 0.128036  | H6                                                  | 0.220456  | 1.129043  | 0.515978  |
| [OSO⋯H⋯CO]-TS-D <sub>0</sub>        |           |           |           | [OSO⋯H⋯CO]-TS-D <sub>1</sub>                        |           |           |           |
| O1                                  | -0.848536 | 1.101389  | -0.006118 | O1                                                  | -0.880004 | 1.125695  | 0.109112  |
| S2                                  | -1.580031 | -0.172472 | -0.399947 | S2                                                  | -0.833558 | -0.346234 | -0.355337 |
| O3                                  | -1.718302 | -1.188156 | 0.644995  | O3                                                  | -0.737655 | -1.107542 | 1.155071  |
| C4                                  | 1.538926  | 0.247550  | -0.303714 | C4                                                  | 1.366796  | 0.408733  | -0.285011 |
| O5                                  | 1.335376  | -0.711919 | -0.937914 | O5                                                  | 2.469416  | 0.134965  | -0.494339 |
| H6                                  | 0.635860  | 0.898588  | 0.129577  | H6                                                  | 0.466843  | 1.236979  | 0.110153  |

| [SO <sub>2</sub> -HCO]-(D <sub>1</sub> /D <sub>0</sub> ) <sub>x</sub> |           |           |           | [SO <sub>2</sub> ···HCO]-D <sub>0</sub> |           |           |           |
|-----------------------------------------------------------------------|-----------|-----------|-----------|-----------------------------------------|-----------|-----------|-----------|
| O1                                                                    | -1.369282 | 0.889673  | -0.250091 | O1                                      | -2.029851 | 1.207399  | -0.220601 |
| S2                                                                    | -0.513966 | -0.360558 | -0.361553 | S2                                      | -2.527992 | -0.135019 | -0.469626 |
| O3                                                                    | -0.695924 | -0.762672 | 1.149274  | O3                                      | -2.771514 | -1.027852 | 0.668800  |
| C4                                                                    | 1.182922  | 0.405772  | -0.154070 | C4                                      | 1.013542  | 0.236186  | -0.379705 |
| O5                                                                    | 2.139562  | 0.161154  | -0.831623 | O5                                      | 0.463059  | -0.747250 | -0.768670 |
| H6                                                                    | 1.108526  | 1.119228  | 0.687710  | H6                                      | 0.470503  | 1.122423  | 0.015707  |

Path 2: HOSO+OC→HOC+SO<sub>2</sub> (step 1)

| [OSOH···OC]-R-D <sub>0</sub> |           |           |           | [OSOH···OC]-R-D <sub>1</sub> |           |           |           |
|------------------------------|-----------|-----------|-----------|------------------------------|-----------|-----------|-----------|
| S1                           | -0.149058 | -0.392401 | -0.110840 | S1                           | -0.167363 | -0.063937 | 0.657914  |
| O2                           | 1.326997  | 0.305691  | 0.175893  | O2                           | 1.190379  | 0.323157  | -0.185499 |
| H3                           | 1.161344  | 1.261727  | 0.257288  | H3                           | 1.416458  | 1.231422  | 0.059481  |
| O4                           | -1.206522 | 0.648859  | -0.130085 | O4                           | -1.243181 | 0.640370  | -0.473116 |
| O5                           | 0.598185  | 3.367971  | 0.388124  | O5                           | 0.623947  | 3.312539  | 0.326977  |
| C6                           | -0.266398 | 4.111146  | 0.342750  | C6                           | -0.355691 | 3.859440  | 0.537372  |

| [OSO···H···OC]-TS-D <sub>1</sub> |           |          |           | [OSO···H···OC]-(D <sub>1</sub> /D <sub>0</sub> ) <sub>x</sub> |           |           |           |
|----------------------------------|-----------|----------|-----------|---------------------------------------------------------------|-----------|-----------|-----------|
| S1                               | -0.204754 | 0.131847 | -0.395858 | S1                                                            | -0.126263 | -0.099941 | -0.288256 |
| O2                               | 1.155154  | 0.722836 | -0.186064 | O2                                                            | 1.197586  | 0.592106  | -0.096195 |
| H3                               | 1.167864  | 1.722823 | 0.477159  | H3                                                            | 1.037985  | 1.943103  | 0.406840  |
| O4                               | -1.281741 | 0.523932 | 0.479020  | O4                                                            | -1.267636 | 0.562662  | 0.355482  |
| O5                               | 0.695764  | 3.189326 | 0.722292  | O5                                                            | 0.795336  | 2.955503  | 0.600853  |
| C6                               | -0.164681 | 3.281290 | -0.172288 | C6                                                            | -0.172459 | 3.349560  | -0.055595 |

| [SO <sub>2</sub> ···HOC]-D <sub>0</sub> |           |           |           |
|-----------------------------------------|-----------|-----------|-----------|
| S1                                      | -0.072031 | -0.237014 | -0.083745 |
| O2                                      | 0.958345  | 0.785226  | 0.053311  |
| H3                                      | 1.032479  | 2.607387  | 0.222589  |
| O4                                      | -1.473991 | 0.173988  | -0.111461 |
| O5                                      | 0.932274  | 3.582796  | 0.307934  |
| C6                                      | -0.300332 | 3.914554  | 0.286067  |

Path 2: HOC→HCO (step 2)

| HOC-D <sub>0</sub> |           |          |          | HOC-TS-D <sub>0</sub> |           |          |          |
|--------------------|-----------|----------|----------|-----------------------|-----------|----------|----------|
| H1                 | 1.046852  | 2.603294 | 0.222824 | H1                    | 0.214849  | 2.675314 | 0.070262 |
| O2                 | 0.923388  | 3.574400 | 0.306786 | O2                    | 0.927100  | 3.523402 | 0.295418 |
| C3                 | -0.305819 | 3.927043 | 0.286982 | C3                    | -0.315195 | 3.861397 | 0.274121 |

| HCO-D <sub>0</sub> |           |          |          |
|--------------------|-----------|----------|----------|
| H1                 | 1.084884  | 2.594278 | 0.215986 |
| O2                 | -0.256364 | 4.092463 | 0.381562 |
| C3                 | 0.843943  | 3.681208 | 0.243315 |

---

Path 3: HOCO+CO→HCO+CO<sub>2</sub>

---

| [OCOH…CO]-D <sub>0</sub> |           |          | [OCOH…CO]-(D <sub>1</sub> /D <sub>0</sub> ) <sub>x</sub> |    |           |          |           |
|--------------------------|-----------|----------|----------------------------------------------------------|----|-----------|----------|-----------|
| O1                       | 1.032747  | 0.560723 | 0.208955                                                 | O1 | 1.021549  | 0.089347 | 0.068004  |
| H2                       | 0.681515  | 0.970259 | -0.597635                                                | H2 | 1.334934  | 0.725961 | -0.622198 |
| O3                       | 0.553427  | 0.907386 | 2.396098                                                 | O3 | -1.102897 | 0.959721 | 1.054756  |
| C4                       | 0.403469  | 1.134193 | 1.245559                                                 | C4 | -0.135044 | 0.486582 | 0.489915  |
| C5                       | -0.138427 | 1.923588 | -2.355319                                                | C5 | 0.570988  | 2.450476 | -1.464253 |
| O6                       | -0.591365 | 2.447140 | -3.255479                                                | O6 | 0.084329  | 3.399141 | -1.845087 |

---

| [CO <sub>2</sub> …HCO]-D <sub>0</sub> |           |          |           |
|---------------------------------------|-----------|----------|-----------|
| O1                                    | 0.651764  | 0.021212 | 0.385482  |
| H2                                    | 1.702147  | 1.554583 | -1.599946 |
| O3                                    | -1.351166 | 0.932443 | 1.168186  |
| C4                                    | -0.349793 | 0.486148 | 0.769894  |
| C5                                    | 1.068287  | 2.443729 | -1.811616 |
| O6                                    | 0.052620  | 2.673112 | -1.230863 |

---

Path 3: OSOS+CO→SO<sub>2</sub>+SCO

---

| [OSOS…CO]-S <sub>0</sub> |          |           | [OSO…S…CO]-TS-S <sub>0</sub> |    |          |           |           |
|--------------------------|----------|-----------|------------------------------|----|----------|-----------|-----------|
| O1                       | 0.456435 | -0.566954 | 0.601705                     | O1 | 0.339878 | -0.675844 | 0.559116  |
| S2                       | 0.782001 | -0.322272 | -0.812071                    | S2 | 0.906324 | -0.533266 | -0.795369 |
| S3                       | 2.345088 | -2.731446 | -0.449902                    | S3 | 2.513935 | -2.943192 | -0.106014 |
| O4                       | 1.799927 | -1.470611 | -1.405023                    | O4 | 1.976427 | -1.615433 | -1.179438 |
| C5                       | 3.424995 | -5.062540 | 1.374374                     | C5 | 3.326117 | -4.777660 | 1.300254  |
| O6                       | 3.828232 | -5.709756 | 2.221876                     | O6 | 3.699227 | -5.610683 | 1.984224  |

---

| [SO <sub>2</sub> …SCO]-S <sub>0</sub> |          |           |           |
|---------------------------------------|----------|-----------|-----------|
| O1                                    | 0.688231 | -1.047753 | 0.542228  |
| S2                                    | 0.911294 | -0.571537 | -0.821454 |
| S3                                    | 2.560380 | -3.730849 | 1.187200  |
| O4                                    | 1.850180 | -1.286397 | -1.679198 |
| C5                                    | 3.390256 | -4.989272 | 1.627970  |
| O6                                    | 4.006553 | -5.924588 | 1.957093  |
